# Supplementary material for: The ex situ exsolved Ni–Ru alloy from nickel–ruthenium co-doped SrFeO3−δ perovskite as a potential catalyst for CC and CO hydrogenation
Source: Royal Society of Chemistry journal article supplement (doi:10.1039/d4se00170b), 2024-01-01
Supplement: d4se00170b1.pdf [file d4se00170b1.pdf]

# ***Ex-situ* Exsolved Ni-Ru Alloy from Nickel-Ruthenium co-doped SrFeO<sub>3-δ</sub> Perovskite as a Potential Catalyst for C=C and C=O Hydrogenation**

**Meloth Bhavisha<sup>a</sup>, Sarkarainadar Balamurugan<sup>b#</sup>, Chinnakonda Subramanian  
Gopinath<sup>c,d</sup>, Ayyamperumal Sakthivel<sup>a\*</sup>**

<sup>a</sup>Inorganic Materials & Heterogeneous Catalysis Laboratory, Department of Chemistry,  
School of Physical Sciences, Sabarmati Building, Tejaswini Hills,  
Central University of Kerala, Kasaragod - 671320, India

<sup>b</sup>Advanced Nanomaterials Research Laboratory, Department of Nanotechnology, Noorul  
Islam Centre for Higher Education, Thuckalay, 629180, India

<sup>c</sup>Catalysis Division, National Chemical Laboratory, Dr Homi Bhabha Road, Pune 411 008,  
India

<sup>d</sup>Academy of Scientific and Innovative Research (AcSIR), Ghaziabad 201002, India

*\*Email:* [sakthivelcuk@cukerala.ac.in/sakthiveldu@gmail.com](mailto:sakthivelcuk@cukerala.ac.in/sakthiveldu@gmail.com)

*ORCID information:* <https://orcid.org/0000-0003-2330-5192>

*#Email:* [scandium.chemistry@gmail.com](mailto:scandium.chemistry@gmail.com)

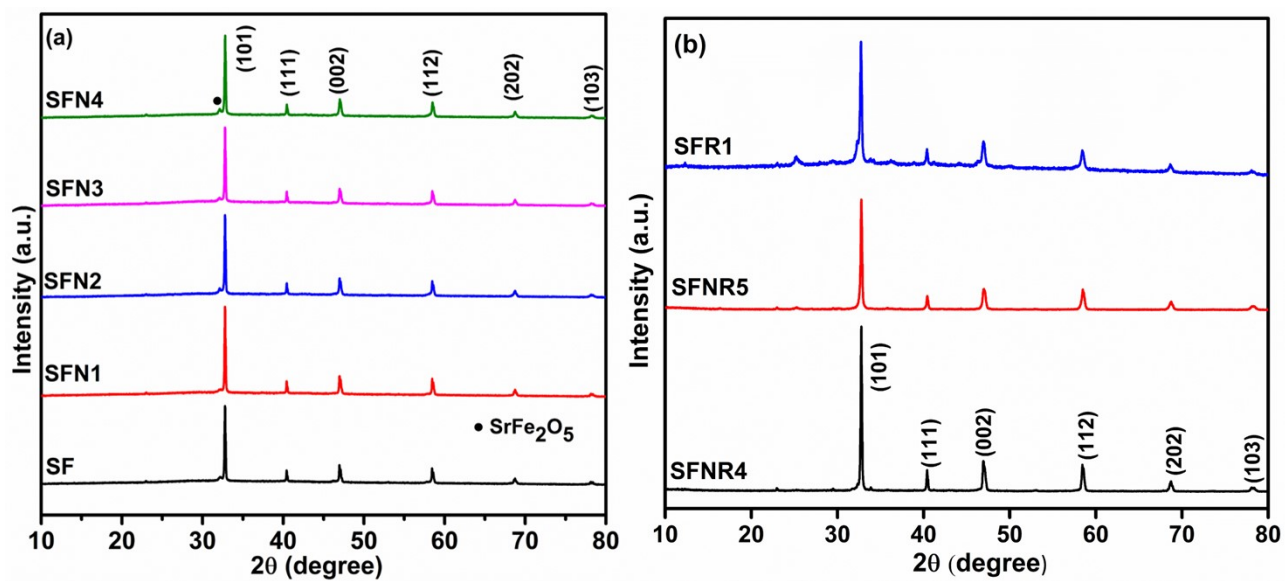

Fig. S1: Powder XRD pattern of annealed (a) SF and SFNx and (b) SFNRx and SFR1 samples.

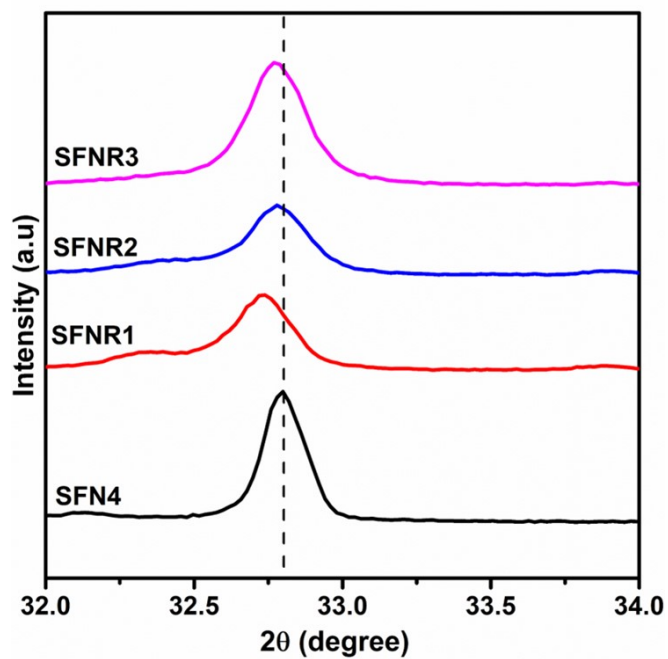

Fig. S2: Powder XRD pattern of annealed samples.

| Sl.No. | Sample | Lattice parameter<br>a (Å) | Unit cell volume V<br>(Å <sup>3</sup> ) | Average crystallite size D<br>(nm) |
|--------|--------|----------------------------|-----------------------------------------|------------------------------------|
| 1      | SF     | 3.861(1)                   | 57.56(2)                                | 46.0                               |
| 2      | SFN4   | 3.861(1)                   | 57.58(2)                                | 39.9                               |
| 3      | SFNR1  | 3.863(6)                   | 57.68(9)                                | 20.5                               |
| 4      | SFNR2  | 3.862(5)                   | 57.61(7)                                | 19.9                               |
| 5      | SFNR3  | 3.863(2)                   | 57.68(3)                                | 23.8                               |
| 6      | SFR1   | 3.864(4)                   | 57.70 (7)                               | 27.5                               |

Table S1: Structural parameters of different synthesized samples.

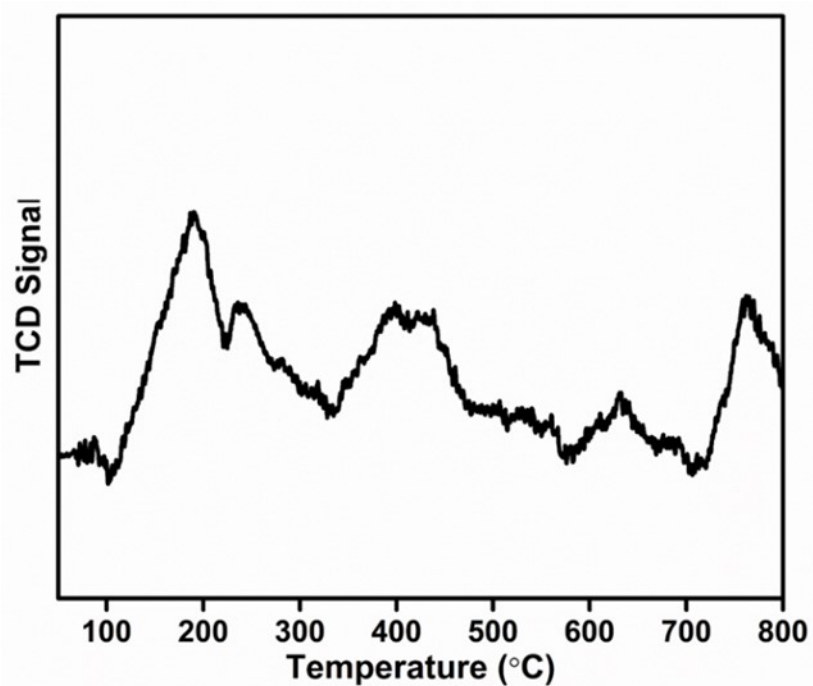

Fig. S3: TPR profile of SFNR1R.

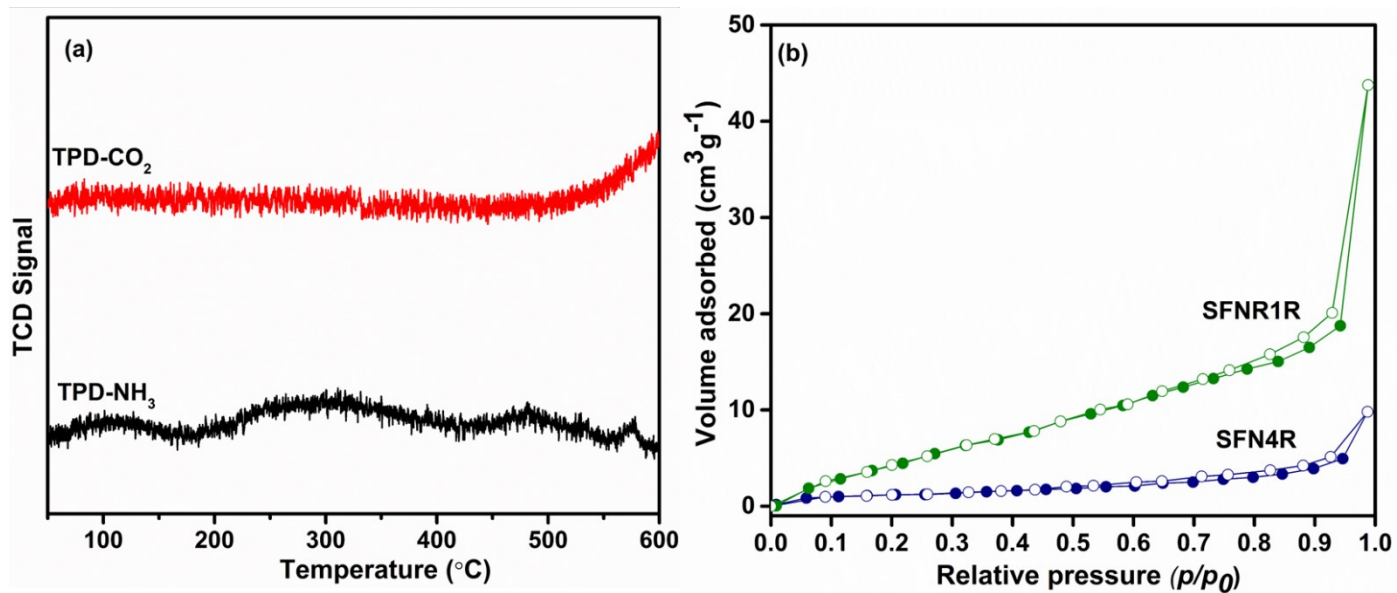

Fig. S4: (a) TPD profile of SFNR1R and (b) N<sub>2</sub> sorption isotherms of reduced samples.

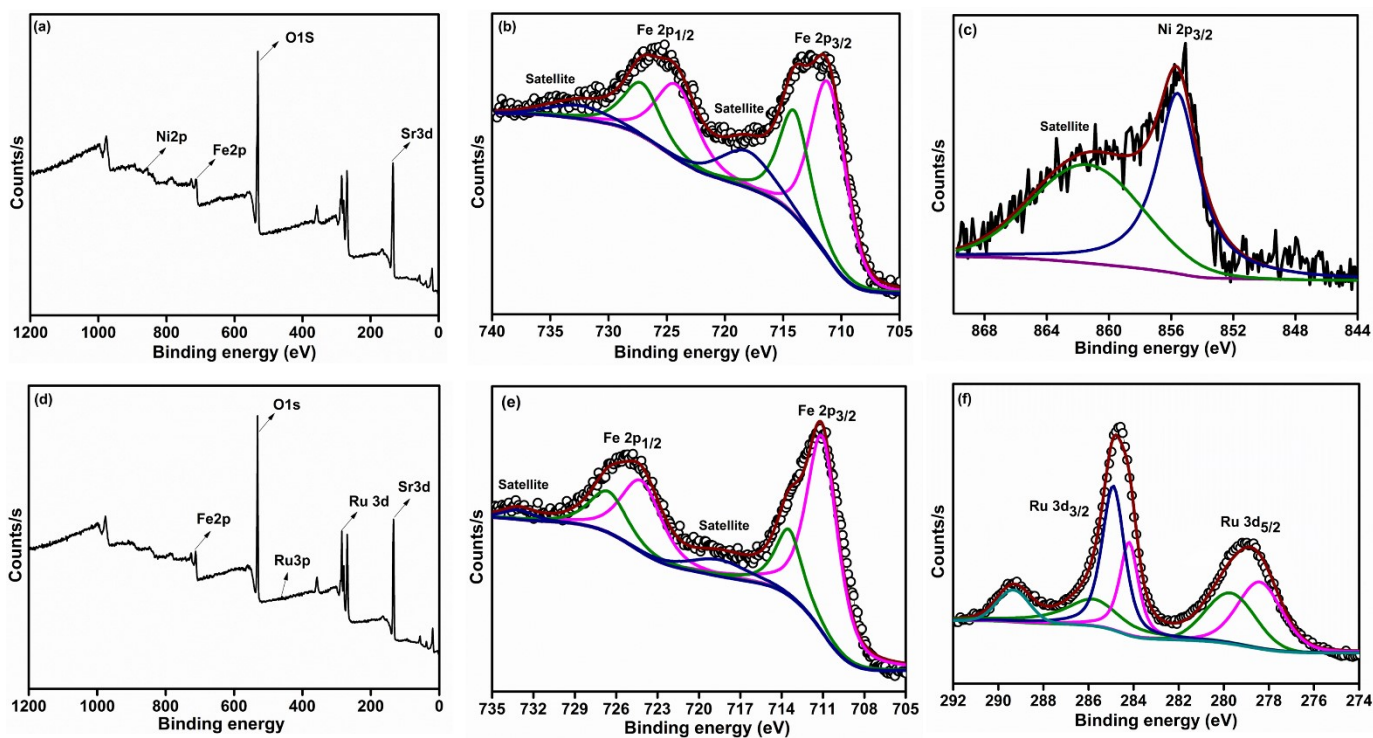

Figure S5: XPS profile of SFN4R- (a) survey spectrum, b) Fe 2p and c) Ni 2p; of SFR1R -d) survey spectrum, e) Fe 2p and f) Ru 3d.

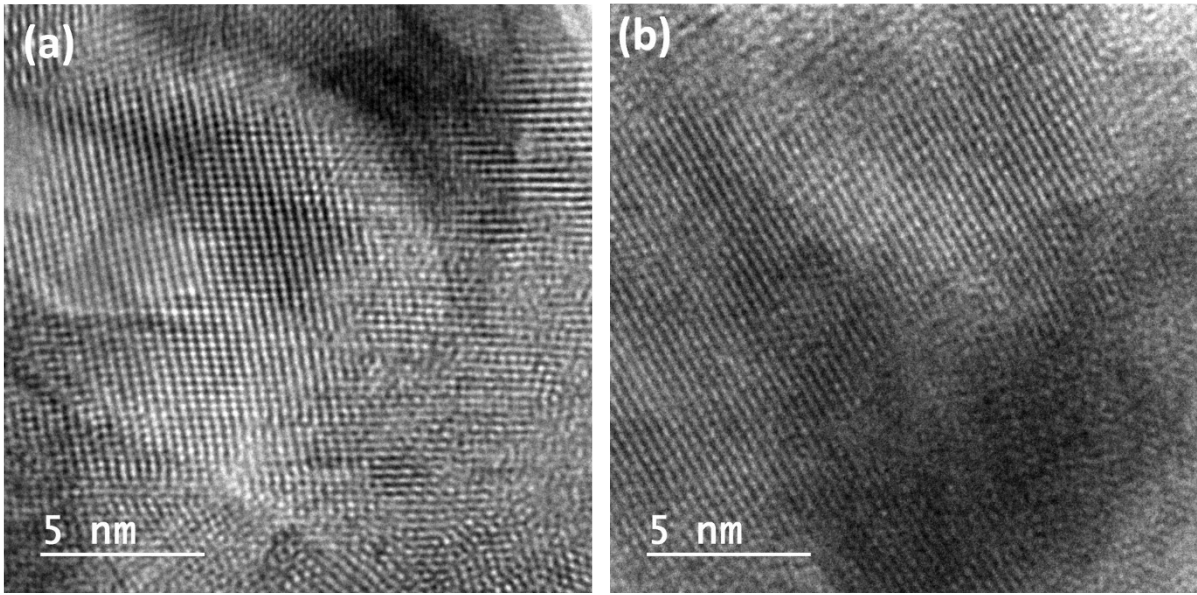

Figure S6: TEM images of (a) SFN4R and (b) SFR1R catalyst.

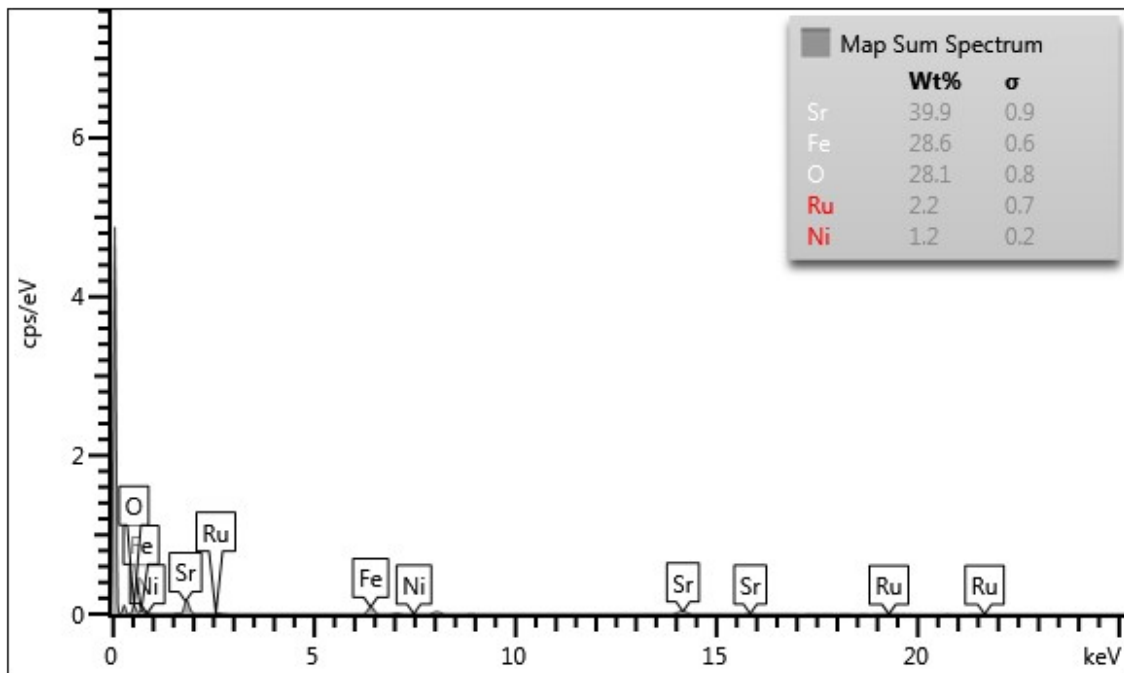

Fig. S7: Elemental composition from TEM analysis.

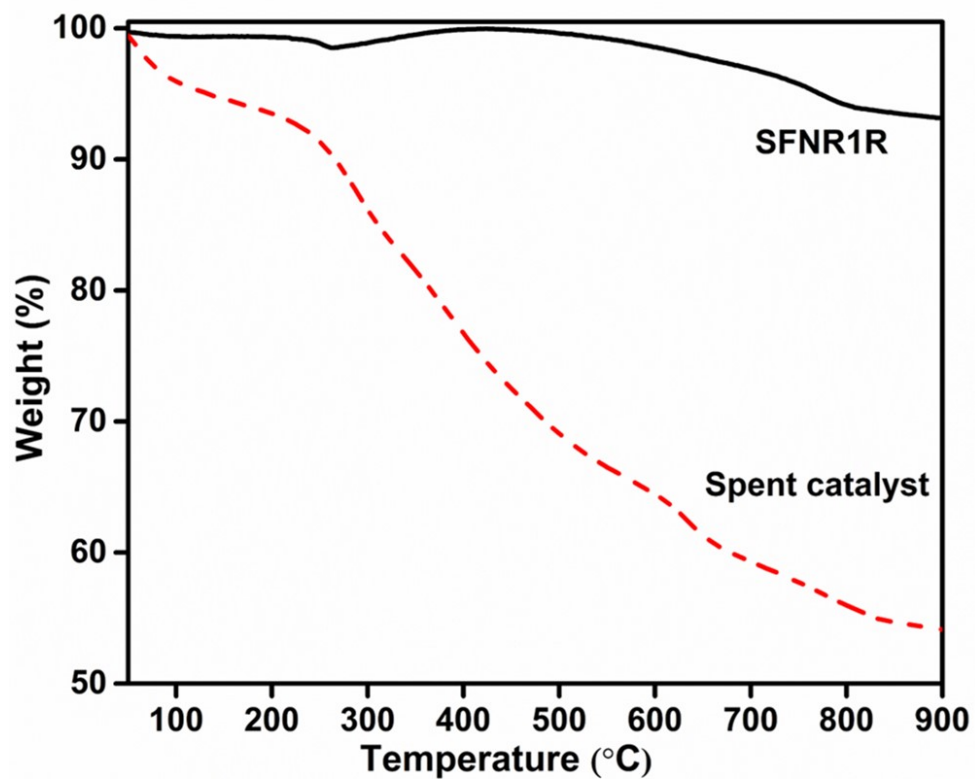

Fig. S8: TGA profile of fresh and spent SFNR1R catalyst in N<sub>2</sub> atmosphere.

Table S2: Comparison of furfural hydrogenation over SFNR1R catalyst with other Ni and Ru and perovskite catalyst reported in literature.

| Sl.No. | Catalyst                                          | Reaction condition                                                                  | Conversion (%) | Selectivity of FOL (%) | Reference     |
|--------|---------------------------------------------------|-------------------------------------------------------------------------------------|----------------|------------------------|---------------|
| 1      | SFNR1R                                            | 2 mmol furfural, 2mL <i>iso</i> -propanol, 10 bar H <sub>2</sub> , 160 °C, 6h       | 99             | 91                     | Present study |
| 2      | MANR2-HT                                          | 1 mmol furfural, 5mL <i>iso</i> -propanol, 10 bar H <sub>2</sub> , 150 °C, 6h       | 100            | 86                     | 26            |
| 3      | Ru/Zr-MOFs                                        | 100μL of furfural in 9.9 mL of H <sub>2</sub> O, 5 bar H <sub>2</sub> , 20 °C, 4 h  | 94.9           | 100                    | 43            |
| 4      | Ni <sub>3</sub> Fe <sub>1</sub> /SiO <sub>2</sub> | 6g furfural, 100 mL methanol, 140°C, 34 bar H <sub>2</sub> , 5h                     | 100            | 96.5                   | 44            |
| 5      | Fe promoted Ni-B amorphous alloy                  | 10 mL furfural, 30 mL ethanol, 100°C, 10 bar H <sub>2</sub> , 4h                    | 85             | 100                    | 45            |
| 6      | 9.89wt% Ru/SiO <sub>2</sub>                       | 10.86 mmol furfural, 50 mL Toluene, 25 bar H <sub>2</sub> , 100 °C, 5h              | 75             | 98                     | 46            |
| 7      | Porous LaFeO <sub>3</sub>                         | 35 μL of furfural, 15mL <i>iso</i> -propanol, 10 bar N <sub>2</sub> , 180 °C, 3h    | 90             | 94                     | 47            |
| 8      | Ov-rich meso LaMnO <sub>3</sub>                   | 0.42mmol of furfural, 15mL <i>iso</i> -propanol, 10 bar N <sub>2</sub> , 180 °C, 3h | 99             | 96.1                   | 48            |
| 9      | NiO-(meso)                                        | 5 mmol furfural, 5 mL <i>iso</i> -propanol, 20 bar H <sub>2</sub> , 150 °C, 5h      | 73             | 100                    | 49            |
| 10     | RuS <sub>3</sub>                                  | 1 atm H <sub>2</sub> , 160 °C, 4h                                                   | 100            | 99                     | 50            |
